# Supplementary material for: Polarity in cuticular ridge development and insect attachment on leaf surfaces of Schismatoglottis calyptrata (Araceae)
Source: publisher site journal article supplement (doi:10.3762/bjnano.12.98), 2021-12-01
Supplement: Additional file 1 [file 2190-4286-12-98-S1.pdf]

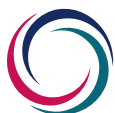

## Supporting Information

for

### **Polarity in cuticular ridge development and insect attachment on leaf surfaces of *Schismatoglottis calyptrata* (Araceae)**

Venkata A. Surapaneni, Tobias Aust, Thomas Speck and Marc Thielen

*Beilstein J. Nanotechnol.* **2021**, *12*, 1326–1338. [doi:10.3762/bjnano.12.98](https://doi.org/10.3762/bjnano.12.98)

## Additional figures

### Leaf size versus leaf age in *Schismatoglottis calyptrate*

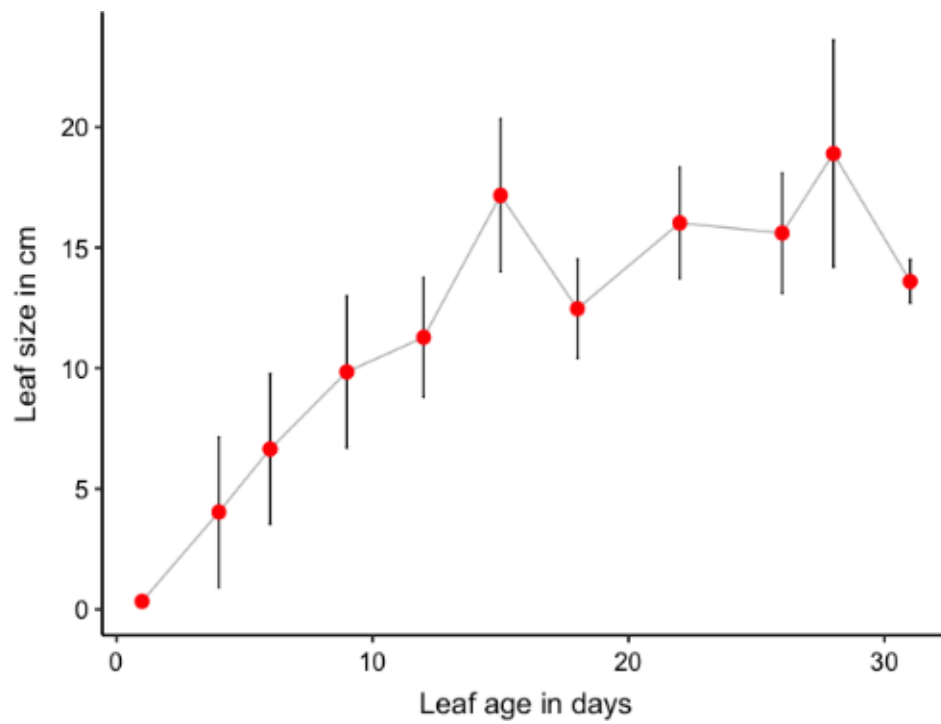

**Figure S1:** The leaf size was measured from the leaf sheath to leaf tip in rolled leaves in growth stages 1 and 2, and from the base to tip in unrolled leaves in stages 3 and 4. The leaves unrolled between day 12 to 21.

## Comparison of characteristic variations in the surface morphology of adaxial *Hevea brasiliensis* and *Schismatoglottis calyptrata* leaves

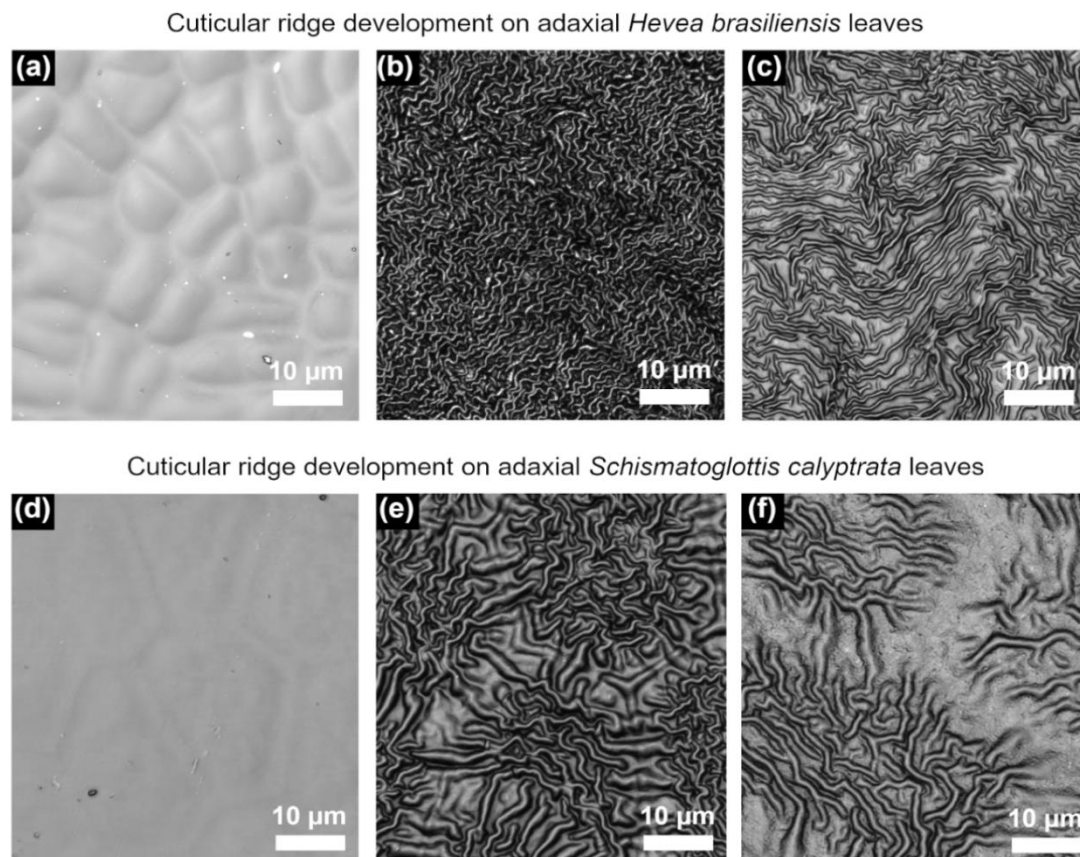

**Figure S2:** Comparison of characteristic variations in the surface morphology of adaxial *Hevea brasiliensis* (a-c), and *Schismatoglottis calyptrata* (d-f) leaves. Three distinct levels of surface morphology was observed on the leaves of both species during development – (a,d) smooth cells, (b,e) high aspect ratio and dense ridges, and (c,f) aged ridges with labyrinth-type arrangement in *Hevea brasiliensis* and loosely arranged ridges with smooth anticlinal fields in *Schismatoglottis calyptrata*. Moreover, the ridges on *Schismatoglottis calyptrata* leaves are relatively thicker when compared to those on *Hevea brasiliensis* leaves. (a-c) were reproduced from [1] (© 2020 V. A. Surapaneni et al., distributed under the terms of the Creative Commons Attribution 4.0 International License, <https://creativecommons.org/licenses/by/4.0>). (d-f) are identical to Figure 1 b, c, and f from this paper.

## Schematic of division of the *Schismatoglottis calyprata* leaves

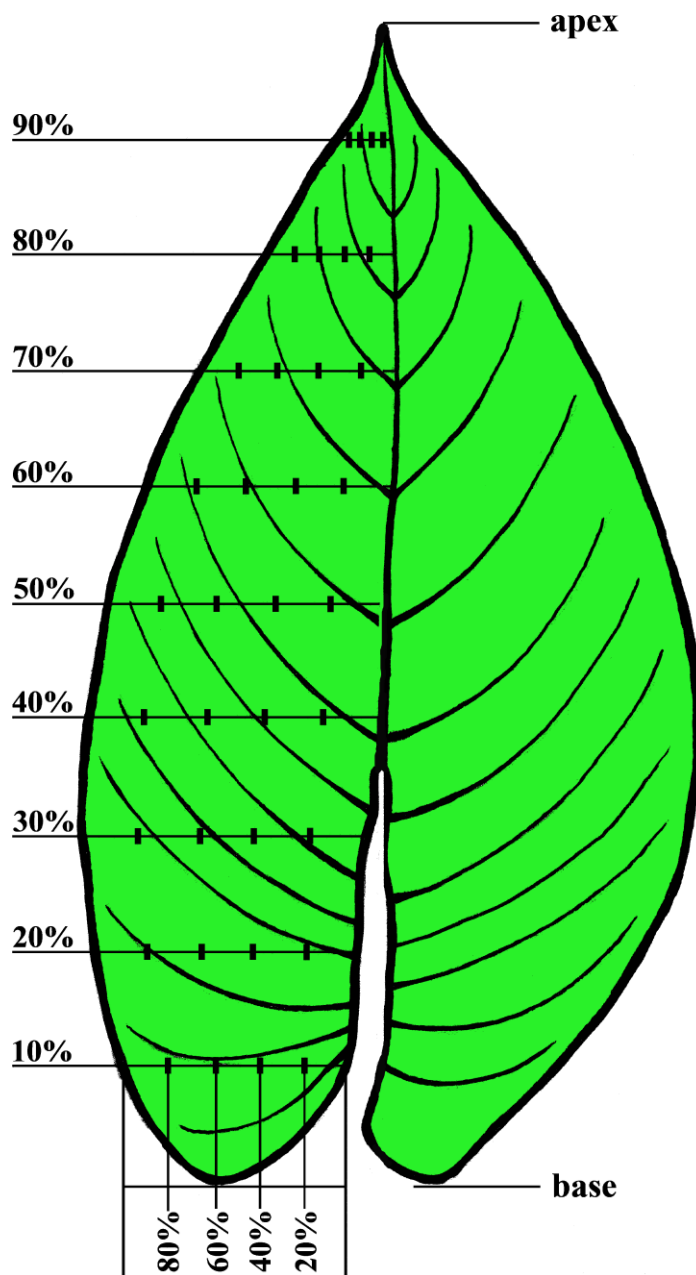

**Figure S3:** A schematic of division of the *Schismatoglottis calyprata* leaves to study spatial variations in ridge morphology. A total of 36 spots at the intersections of the divisions on leaf replicas were recorded using confocal laser scanning microscopy.

## References

1. Surapaneni, V. A.; Bold, G.; Speck, T.; Thielen, M. R. *Soc. Open Sci.* **2020**, *7*, 201319. doi:[10.1098/rsos.201319](https://doi.org/10.1098/rsos.201319)
