# Supplementary material for: Polarity in cuticular ridge development and insect attachment on leaf surfaces of Schismatoglottis calyptrata (Araceae)
Source: publisher site journal article supplement (doi:10.3762/bjnano.12.98), 2021-12-01

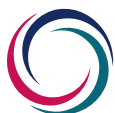

## Supporting Information

for

### **Polarity in cuticular ridge development and insect attachment on leaf surfaces of *Schismatoglottis calyptрата* (Araceae)**

Venkata A. Surapaneni, Tobias Aust, Thomas Speck and Marc Thielen

*Beilstein J. Nanotechnol.* **2021**, *12*, 1326–1338. doi:10.3762/bjnano.12.98

#### **Orientation of ridges in ridge islands and periphery.**

**The orientation data was collected from the ridge islands and the periphery of a cell using the directionality plugin of the ImageJ software. The data shows typical variation in the ridge orientation (angle with horizontal) at different growth stages**

## Orientation of ridges in ridge islands and periphery

Detailed description: The orientation data was collected from the ridge islands and the periphery of a cell using the directionality plugin (version 2.3.0) of the ImageJ software. The data shows typical variation in the ridge orientation in a single ridge island and periphery (angle with horizontal – perpendicular to leaf's midrib) at different growth stages in the form of frequency histograms.

### Stage 2A

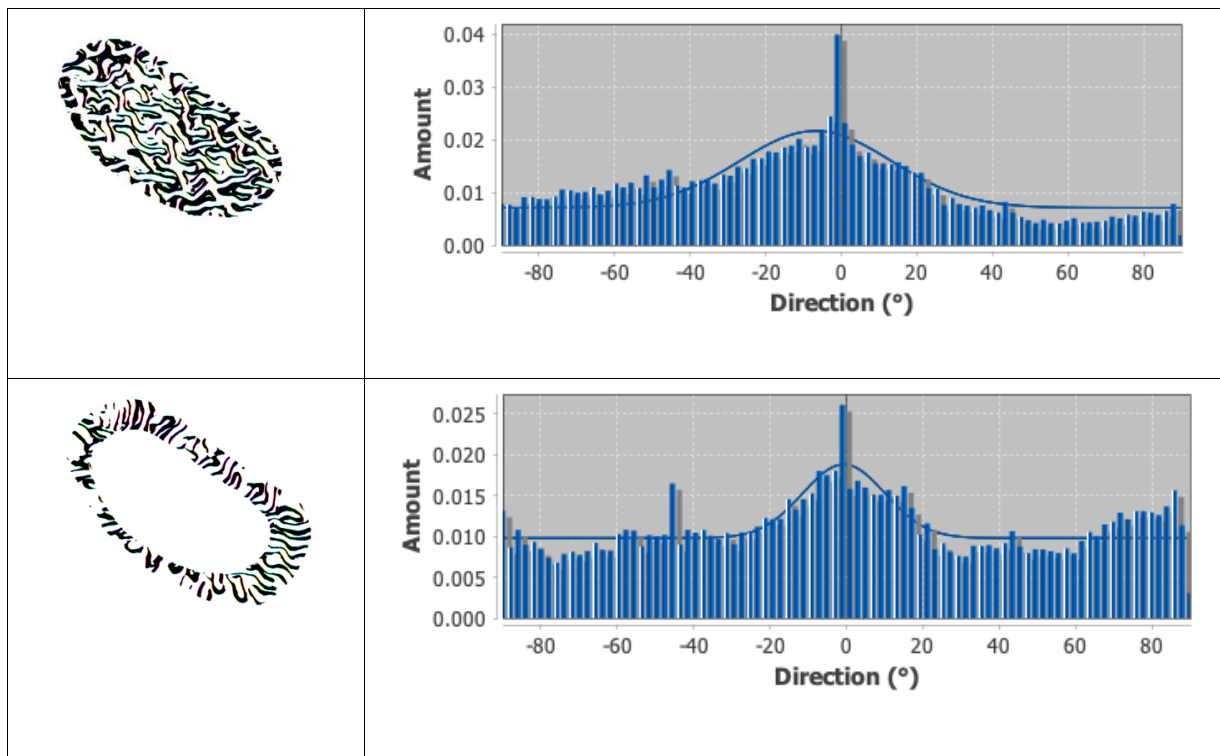

### Stage 3

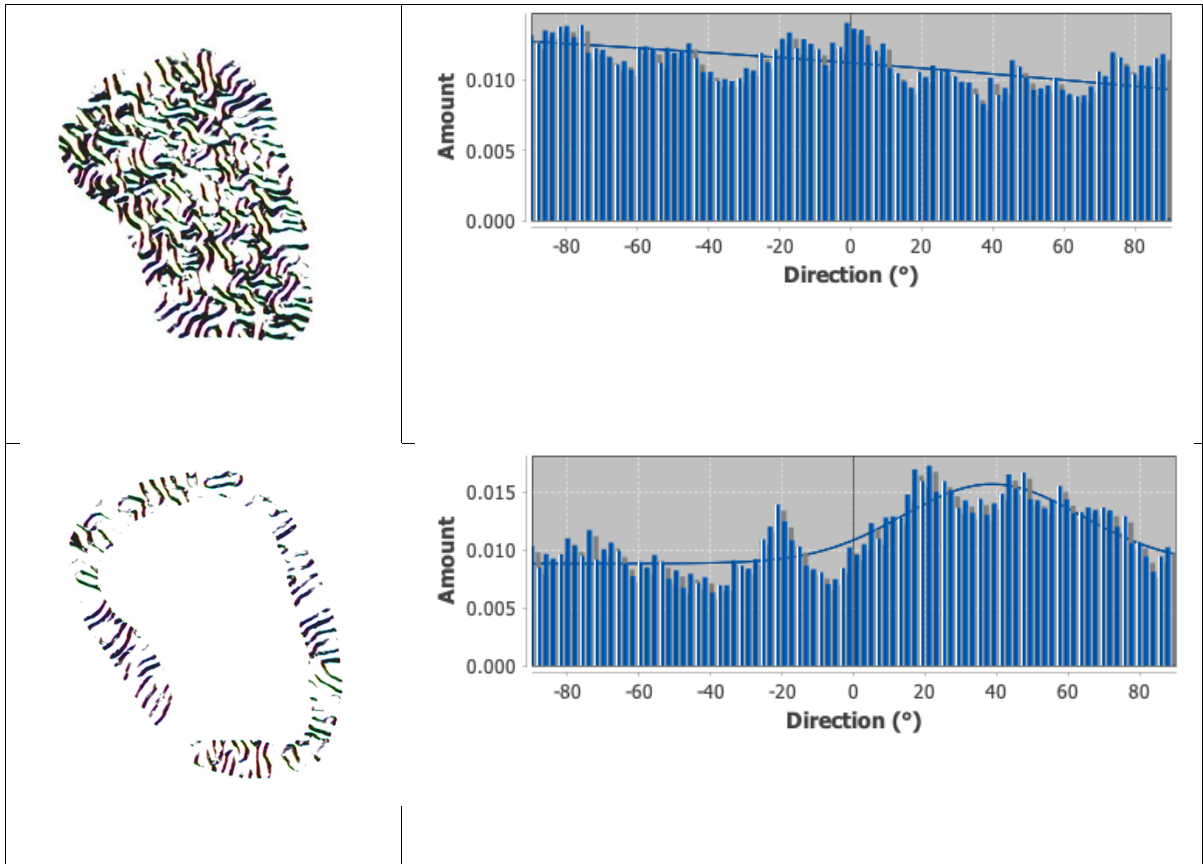

### Stage 4

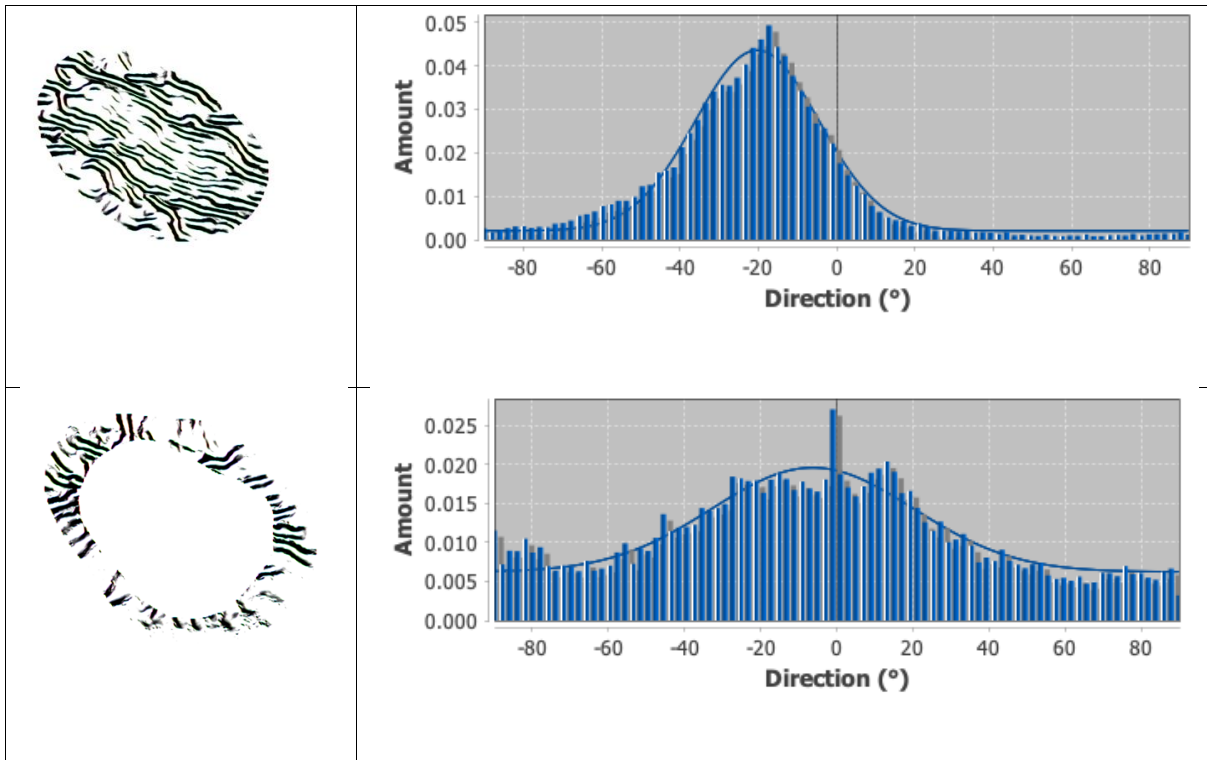

Supplement: Additional file 2 [file 2190-4286-12-98-S2.pdf]
